# Supplementary material for: Hellbender Genome Sequences Shed Light on Genomic Expansion at the Base of Crown Salamanders
Source: PubMed Central journal article supplement (PMC4122941; doi:10.1093/gbe/evu143), 2014-06-23

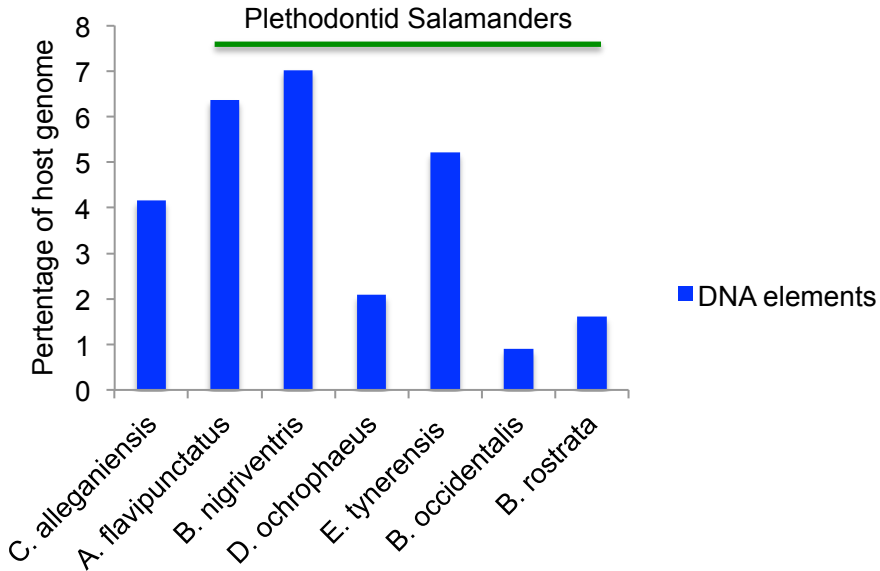

Supplement: supp_evu143_AdditionalFile3.pdf [file supp_evu143_AdditionalFile3.pdf]
